# Supplementary material for: Intermittent treatment with farnesyltransferase inhibitor and sulforaphane improves cellular homeostasis in Hutchinson-Gilford progeria fibroblasts
Source: PubMed Central journal article supplement (PMC5630293; doi:10.18632/oncotarget.19363), 2017-07-18
Supplement: oncotarget-08-64809-s001.pdf [file oncotarget-08-64809-s001.pdf]

## Intermittent treatment with farnesyltransferase inhibitor and sulforaphane improves cellular homeostasis in Hutchinson-Gilford progeria fibroblasts

### SUPPLEMENTARY MATERIALS

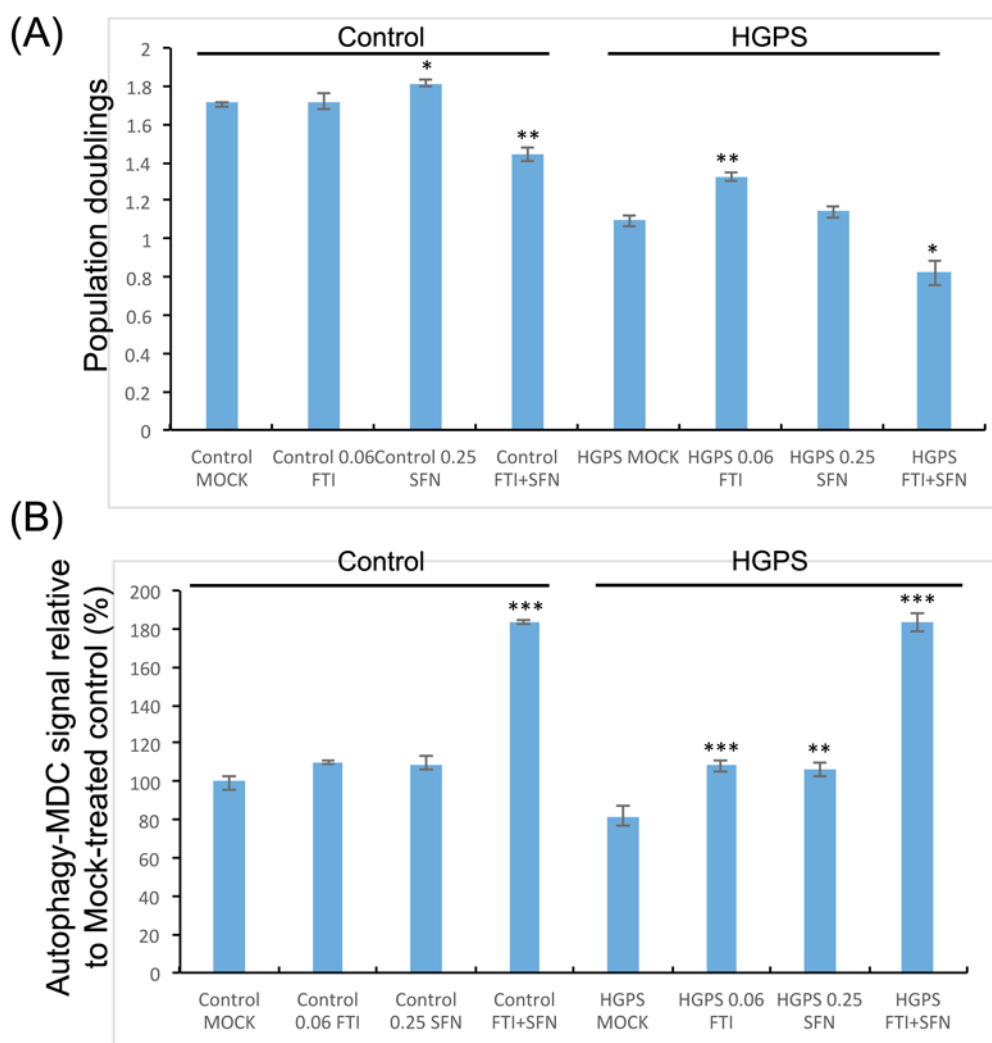

**Supplementary Figure 1: Effect of combining 0.06  $\mu$ M of FTI with 0.25  $\mu$ M of SFN on HGPS cells.** (A) Population doublings were calculated as stated in Materials and Methods for control and HGPS fibroblasts. Cells were either treated with vehicle (DMSO), SFN (0.25  $\mu$ M), FTI (0.06  $\mu$ M), or combined drugs at the following concentrations: 0.06  $\mu$ M FTI plus 0.25  $\mu$ M SFN for a period of 3 days. (B) The same cells as in (A) were used to measure the levels of autophagy vacuoles by monodansylcadaverine (MDC) as described in Materials and Methods. Data are expressed as the mean  $\pm$  S.D. (\*p-value  $\leq$  0.05; n=3).

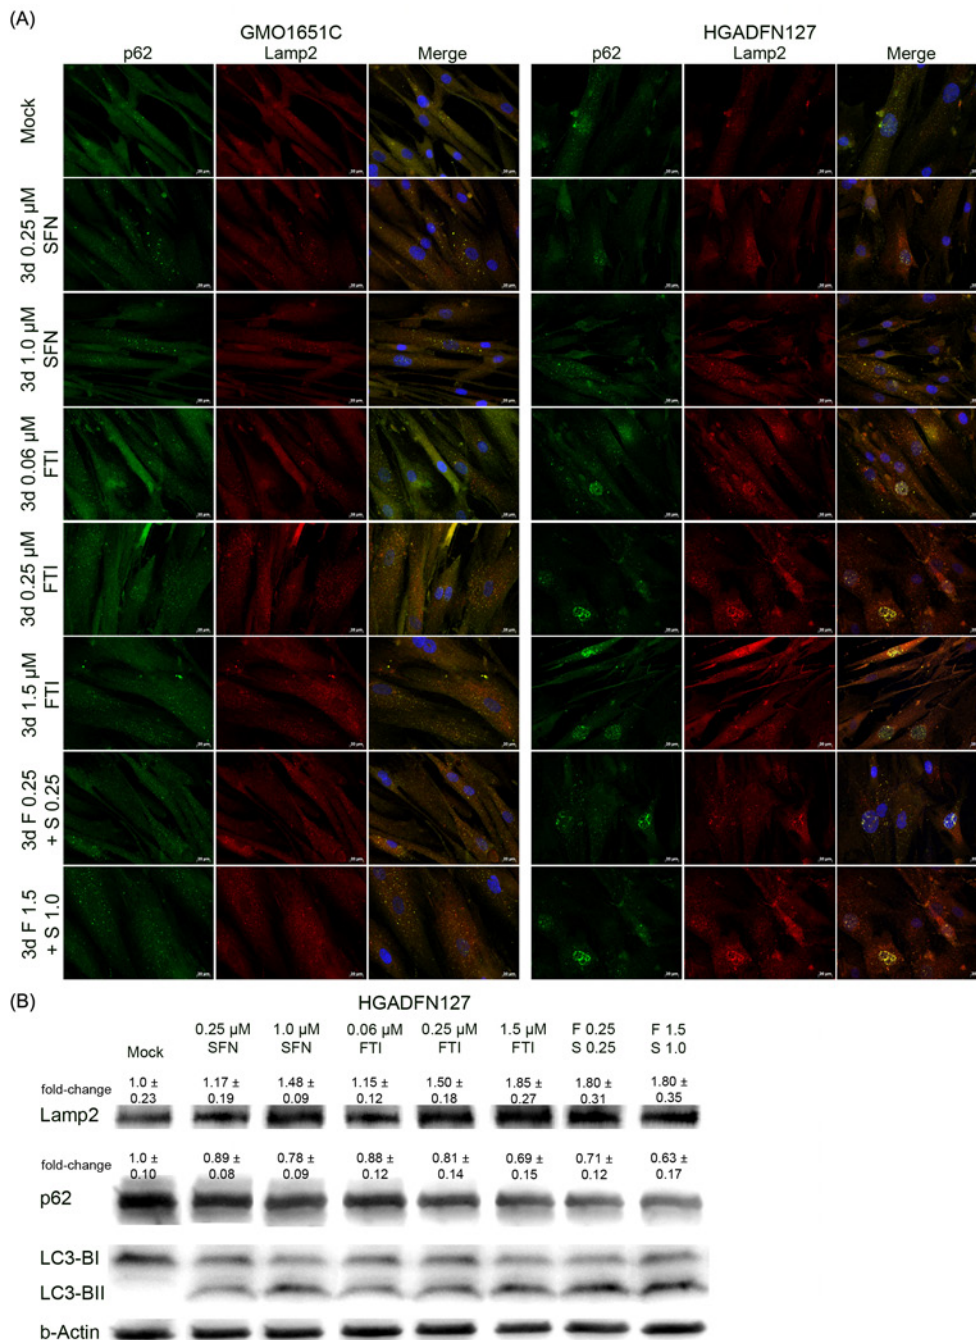

**Supplementary Figure 2: Analysis of autophagic flux in HGPS cells treated with FTI and SFN in combination.** (A) Immunocytochemistry was performed of control (GMO1651C) and HGPS (HGADFN127) cells using antibodies against p62 and LAMP2. Cells were either mock-treated or treated with 0.25 μM SFN, 1.0 μM SFN, 0.06 μM FTI, 0.25 μM FTI, 1.5 μM FTI, or the combination of both drugs at 0.25 μM SFN/0.25 μM FTI, or 1.0 μM SFN/1.5 μM FTI for a period of 3 days, as indicated. Representative images are shown (n=3). Scale bar: 20 μM. (B) Western blot analysis of the same samples as in (A) was performed using antibodies against Lamp2, p62, LC3B, or b-Actin. Numbers above each band indicate the fold-change ± S.D. of protein expression relative to their mock-treated counterparts. Representative image are shown (n=3).
